# Supplementary material for: Pediatric Intensive Care Unit Admissions for COVID-19: Insights Using State-Level Data
Source: Int J Pediatr. 2020 Nov 18;2020:9680905. doi: 10.1155/2020/9680905 (PMC7704189; doi:10.1155/2020/9680905)
Supplement: Supplementary materials — Supplementary Table 1 Information resource for state-wide data collection. Supplementary Table 2 States that reported data for each endpoint. Supplementary Table 3 Power analyses for multivariate regression analysis. [file 9680905.f1.zip]

Archive with 3 entries (3 files):
- Supplementary Table 1.docx
- Supplementary Table 2.docx
- Supplementary Table 3.docx
