# Supplementary material for: Pediatric Intensive Care Unit Admissions for COVID-19: Insights Using State-Level Data
Source: Int J Pediatr. 2020 Nov 18;2020:9680905. doi: 10.1155/2020/9680905 (PMC7704189; doi:10.1155/2020/9680905)
Supplement: Supplementary materials — Supplementary Table 1 Information resource for state-wide data collection. Supplementary Table 2 States that reported data for each endpoint. Supplementary Table 3 Power analyses for multivariate regression analysis. [file 9680905.f1.zip › Supplementary Table 2.docx]

**Supplementary Table 2. States that reported data for each outcome**

| **Outcomes** | **States that reported data** |
| --- | --- |
| PICU Admissions | All states, except Mainea and Wyomingb. |
| PICU Admission Mortality | All states, except Alaska, Arizona, Arkansas, Hawaii, Idaho, Kansas, Mainea, Minnesota, Montana, Nebraska, Nevada, New Hampshire, New Mexico, North Dakota, Oklahoma, Oregon, Rhode Island, South Dakota, Tennessee, Utah, Vermont, West Virginia, Wisconsin and Wyomingb. |
| PICU Days | All states, except Alaska, Arizona, Arkansas, Hawaii, Idaho, Kansas, Mainea, Minnesota, Montana, Nebraska, Nevada, New Hampshire, New Mexico, North Dakota, Oklahoma, Oregon, Rhode Island, South Dakota, Tennessee, Utah, Vermont, West Virginia, Wisconsin and Wyomingb. |
| ECMO Days | All states, except Alaska, Arizona, Arkansas, Hawaii, Idaho, Kansas, Mainea, Minnesota, Montana, Nebraska, Nevada, New Hampshire, New Mexico, North Dakota, Oklahoma, Oregon, Rhode Island, South Dakota, Tennessee, Utah, Vermont, West Virginia, Wisconsin and Wyomingb. |
| HFOV Days | All states, except Alaska, Arizona, Arkansas, Hawaii, Idaho, Kansas, Mainea, Minnesota, Montana, Nebraska, Nevada, New Hampshire, New Mexico, North Dakota, Oklahoma, Oregon, Rhode Island, South Dakota, Tennessee, Utah, Vermont, West Virginia, Wisconsin and Wyomingb. |
| Conventional Ventilator | All states, except Alaska, Arizona, Arkansas, Hawaii, Idaho, Kansas, Mainea, Minnesota, Montana, Nebraska, Nevada, New Hampshire, New Mexico, North Dakota, Oklahoma, Oregon, Rhode Island, South Dakota, Tennessee, Utah, Vermont, West Virginia, Wisconsin and Wyomingb. |
| NIV3 Days | All states, except Alaska, Arizona, Arkansas, Hawaii, Idaho, Kansas, Mainea, Minnesota, Montana, Nebraska, Nevada, New Hampshire, New Mexico, North Dakota, Oklahoma, Oregon, Rhode Island, South Dakota, Tennessee, Utah, Vermont, West Virginia, Wisconsin and Wyomingb. |
| HFNC4 Days | All states, except Alaska, Arizona, Arkansas, Hawaii, Idaho, Kansas, Mainea, Minnesota, Montana, Nebraska, Nevada, New Hampshire, New Mexico, North Dakota, Oklahoma, Oregon, Rhode Island, South Dakota, Tennessee, Utah, Vermont, West Virginia, Wisconsin and Wyomingb. |
| Population density | All states, except Mainea and Wyomingb. |
| Urban air quality | All states, except Mainea and Wyomingb. |
| Drinking water quality | All states, except Mainea and Wyomingb. |
| UV index | All states, except Alaska, Mainea and Wyomingb. |
| Average precipitation | All states, except Hawaii, Mainea and Wyomingb. |
| Average temperature | All states, except Hawaii, Mainea and Wyomingb. |
| Percent households below poverty line | All states, except Mainea and Wyomingb. |
| Percent households below high school as highest level of education for the adults | All states, except Mainea and Wyomingb. |
| Percent pediatric obesity | All states, except Mainea and Wyomingb. |
| Percent pediatric type 1 diabetes | All states, except Mainea and Wyomingb. |
| Percent pediatric asthma | All states, except Alabama, Alaska, Arizona, Arkansas, Colorado, Delaware, Idaho, Iowa, Louisiana, Mainea, North Carolina, North Dakota, Oklahoma, South Carolina, South Dakota, Tennessee, Texas, Virginia, Washington, West Virginia and Wyomingb. |
| Percent among high school youth current smoker | All states, except Mainea and Wyomingb. |
| Percent pediatric flu vaccination received | All states, except Mainea and Wyomingb. |
| Percent pediatric with health insurance | All states, except Mainea and Wyomingb. |
| Percent by racial group | All states, except Mainea and Wyomingb. |
| Social distancing score | All states, except Mainea and Wyomingb. |

*Abbreviations: PICU, Pediatric Intensive Care Unit; ECMO, Extracorporeal Membrane Oxygenator; NIV, Noninvasive Ventilation; HFOV, High-Flow Nasal Cannula; UV: Ultraviolet.*

a, b Maine and Wyoming where the only states that didn’t report data to the Virtual Pediatric Systems, LLC (VPS-LLC).
